# Supplementary material
Source: publisher figshare collection journal article supplement (https://acs.figshare.com/ndownloader/files/4580221)
Supplement: Supplementary file 1 [file 4580221]

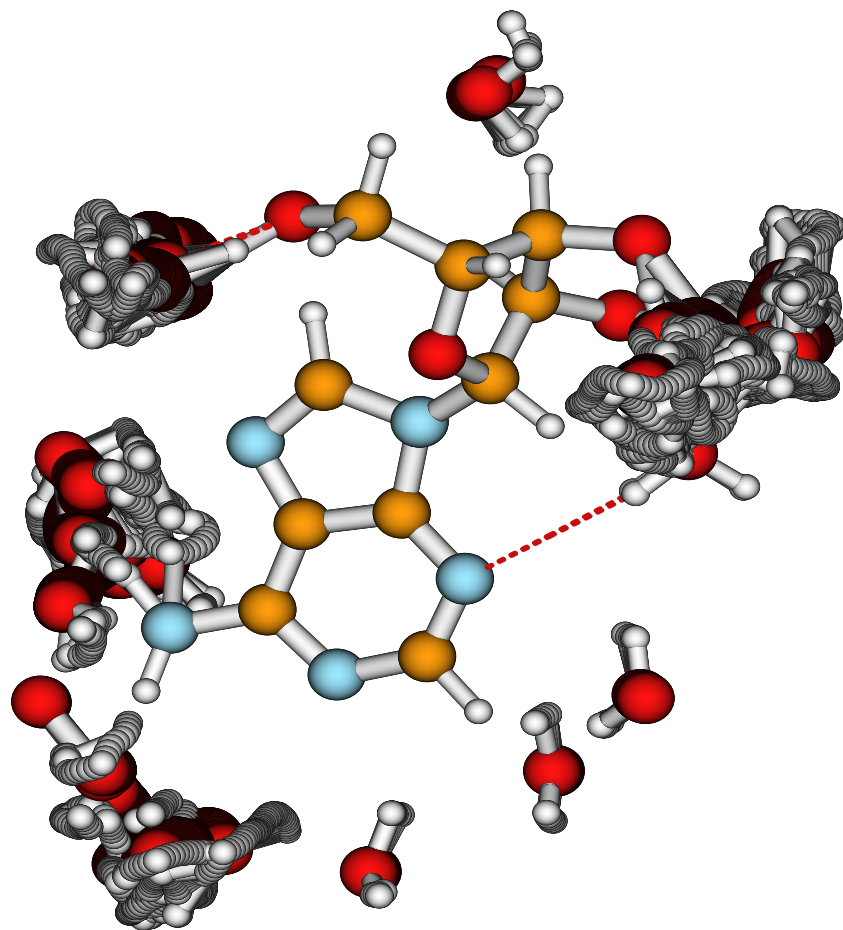

Figure 1 Solvent density around anti-form of adenosine



Figure 2 Solvent density around syn-form of adenosine



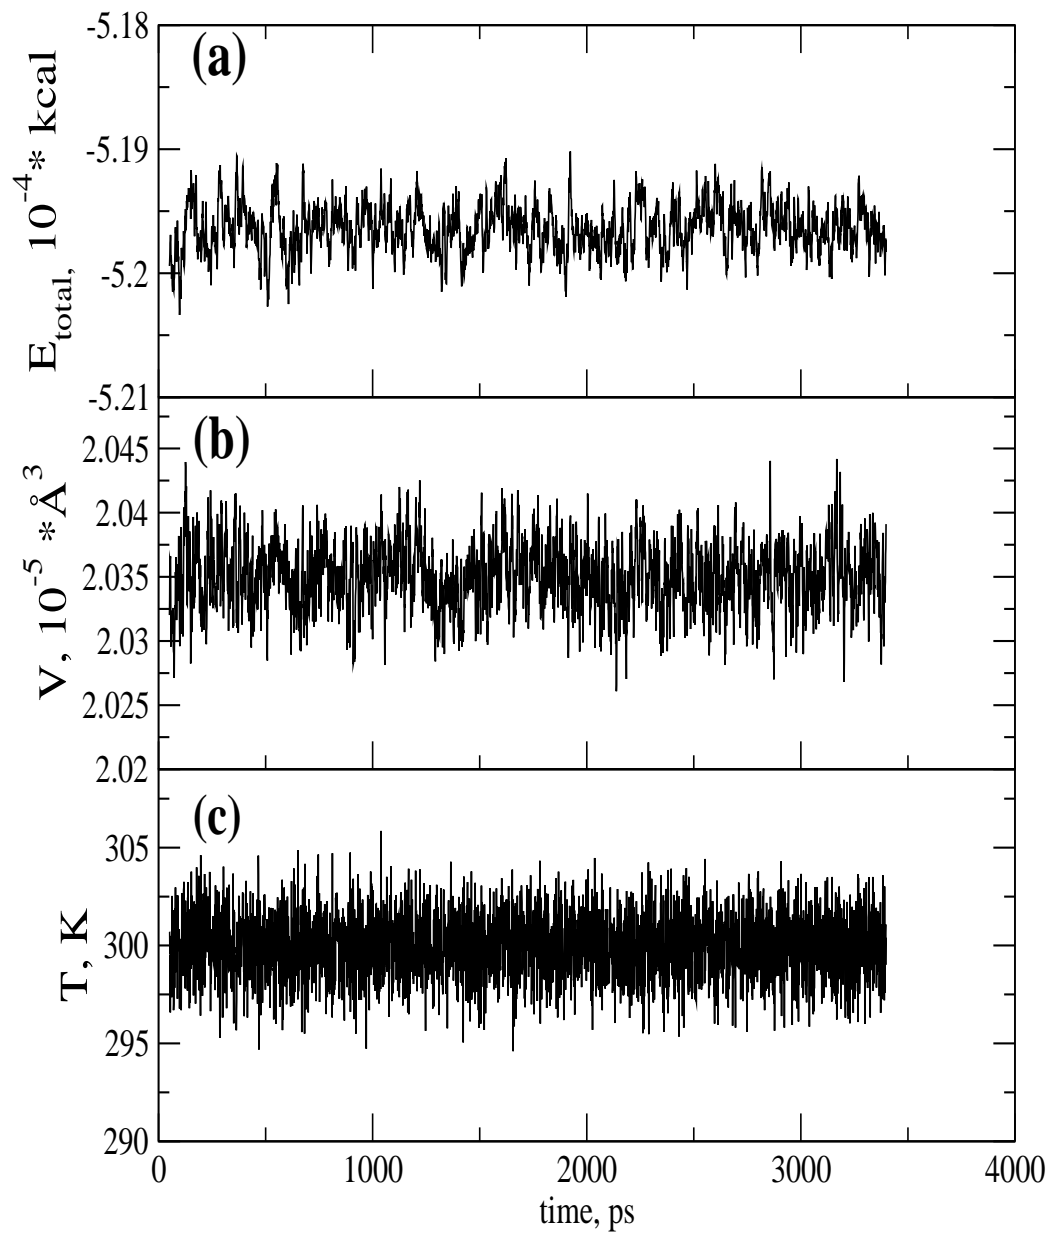

Figure 3 Time evolution of total interaction energy, volume and temperature for adenosine-water system

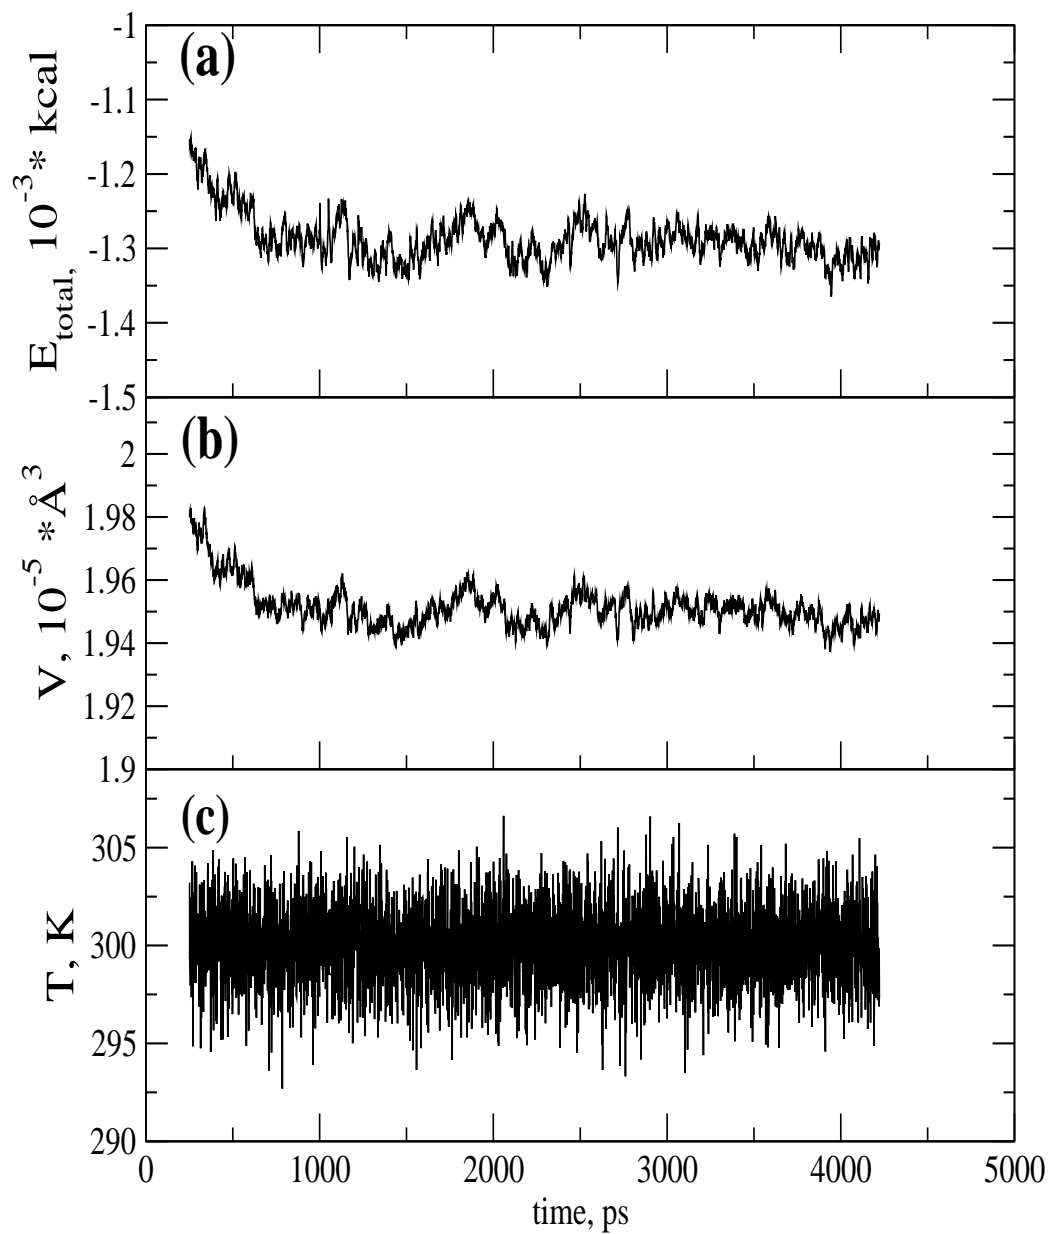

Figure 4 Time evolution of total interaction energy, volume and temperature for adenosine-chloroform system
